# Supplementary material
Source: PubMed Central journal article supplement (PMC3478592)
Supplement: 1205742109_pnas.201205742SI.pdf [file 1205742109_pnas.201205742SI.pdf]

# Supporting Information

Nayar et al. 10.1073/pnas.1205742109

## SI Methods

**Phospho-STAT6 Staining.** Splenocytes were harvested from naive OT-I WT or OT-I IFN regulatory factor 4 (*Irf4*)<sup>fl/fl</sup>*CD4-Cre*<sup>+</sup> [hereafter referred to as *Irf4*<sup>-/-</sup>(*T*)] mice and rested for 30 min at 37 °C; for 10n (a small-molecule inhibitor of Tec family tyrosine kinase) experiments, cells were preincubated with dilutions of the inhibitor in RPMI-10. After incubation, cells were incubated in the presence or absence of IL-4 (10 ng/mL) in RPMI-10 or diluted into the same concentrations of 10n or DMSO for 30 min. Cells were fixed with BD Biosciences Cytofix for 15 min on ice, washed, and surface-stained. Cells were then permeabilized with BD Sciences Phosphoflow-Perm Buffer III for 30 min on ice, washed,

stained with  $\alpha$ -phospho-STAT6 at room temperature for 1 h in the dark, and analyzed immediately by flow cytometry.

**Bone Marrow Chimeras.** Bone marrow was harvested from the femurs and tibia of congenically marked WT or *Irf4*<sup>-/-</sup>(*T*) mice. Lineage-specific cells were depleted using CD4, CD8, and CD90.1/CD90.2 magnetic affinity cell sorting beads. WT and *Irf4*<sup>-/-</sup>(*T*) bone marrow cells were mixed in various ratios, and  $6 \times 10^6$  cells were adoptively transferred into sublethally (600-rad) irradiated congenic *Rag2*<sup>-/-</sup> (CD45.1<sup>+</sup>) hosts. Seven and one-half weeks after reconstitution, splenocytes or peripheral blood cells were stained with antibodies to CD8, CD44, CD45.1, CD45.2, CD90.1, and CD90.2.
